# Supplementary material for: Heterozygous loss of Rbm24 in the adult mouse heart increases sarcomere slack length but does not affect function
Source: PubMed Central journal article supplement (PMC7203132; doi:10.1038/s41598-020-64667-0), 2020-05-06

## Supplemental information

Heterozygous loss of Rbm24 in the adult mouse heart increases sarcomere slack length but does not affect function

de Groot NE<sup>1\*</sup>, van den Hoogenhof MMG<sup>1\*</sup>, Najafi A<sup>2</sup>, van der Made I<sup>1</sup>, van der Velden J<sup>2</sup>,

Beqqali A<sup>1</sup>, Pinto YM<sup>1</sup>, Creemers EE<sup>1</sup>

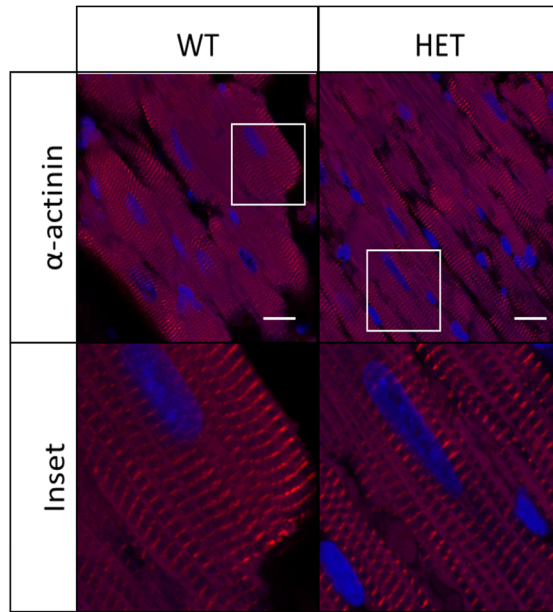

**Supplemental Figure 1:  $\alpha$ -actinin immunohistochemistry hearts of adult WT and Rbm24 HET mice.**  
Representative images are shown and scale bar represents 20 $\mu$ m.

A

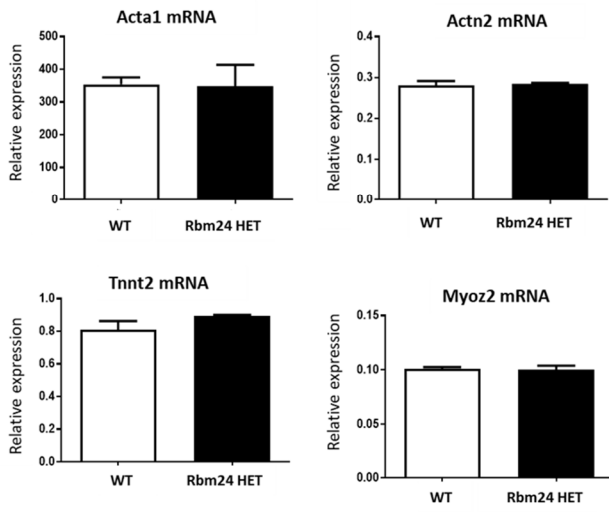

B

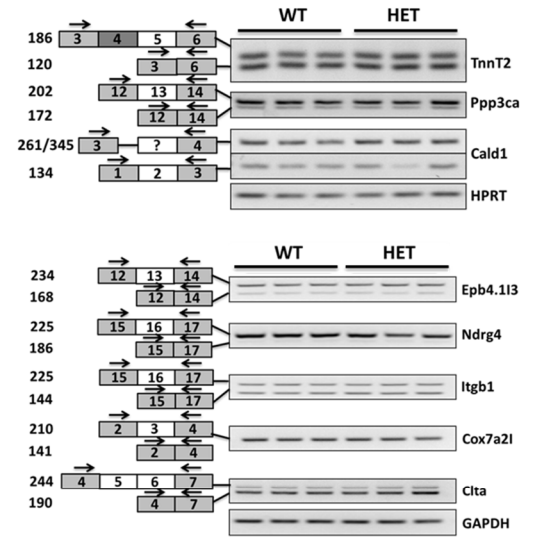

**Supplemental Figure 2: Alternative splicing and mRNA expression in adult Rbm24 HET hearts.** **A.** qRT-PCR for mRNA of Acta1, Actn2, Tnnt2, Myoz2 and Ryr2 in adult Rbm24 HET hearts (n=3) and in WT controls (n=3). Expression is normalized by GAPDH expression. Student's t-test did not reveal significant changes. **B.** RT-PCR results of previously identified Rbm24 target genes<sup>14</sup> in adult hearts of WT (n=3) and Rbm24 HET (n=3) mice show that alternative splicing is not affected.

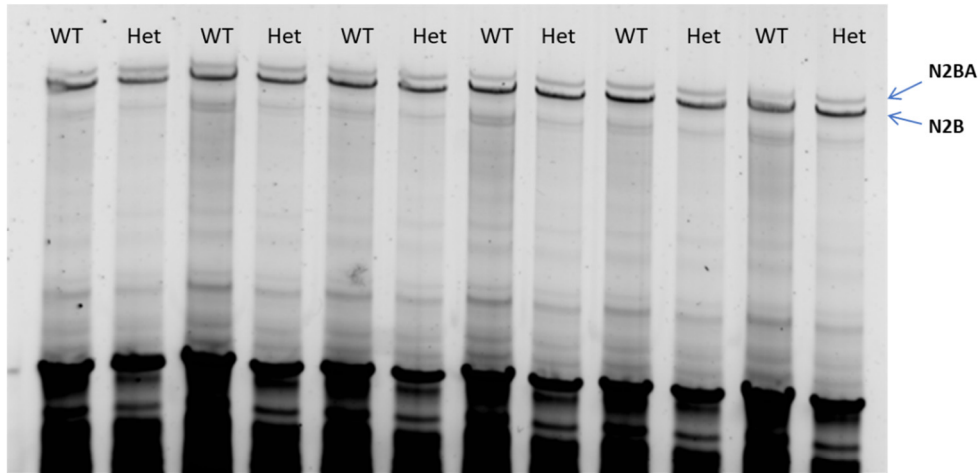

**Supplemental Figure 3:** Titin isoforms analysis by SDS-agarose gelelectrophoresis. SDS-agarose gel electrophoresis of protein extracts of WT and Rbm24 HET hearts shows the expression of two TTN isoforms: N2BA and N2B.

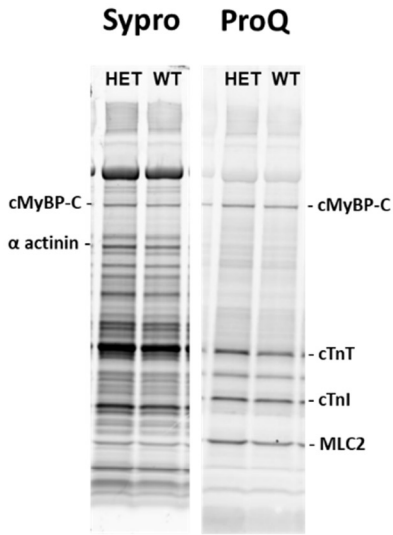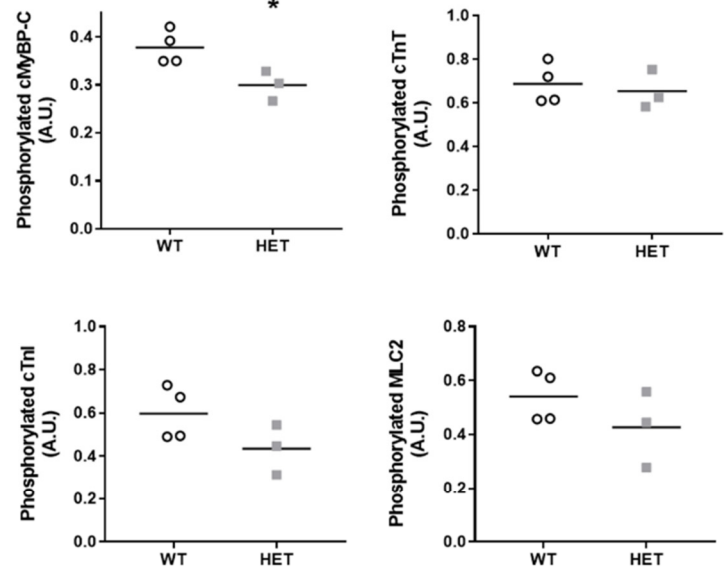

**Supplemental Figure 4:** Proteins separated by gel electrophoresis were stained with SYPRO Ruby and Pro-Q Diamond Phosphoprotein Stain and enables the simultaneous analyses of expression levels and phosphorylation of myofilament proteins cardiac myosin-binding protein C (cMyBP-C), cardiac troponin T (cTnT), cardiac troponin I (cTnI) and myosin light chain 2 (MLC2). 3 WT and 3 Rbm24 HET hearts were analyzed. A slightly lower phosphorylation of cMyBP-C was observed in HET compared to WT. Student's T-test \* $P < 0.05$ .

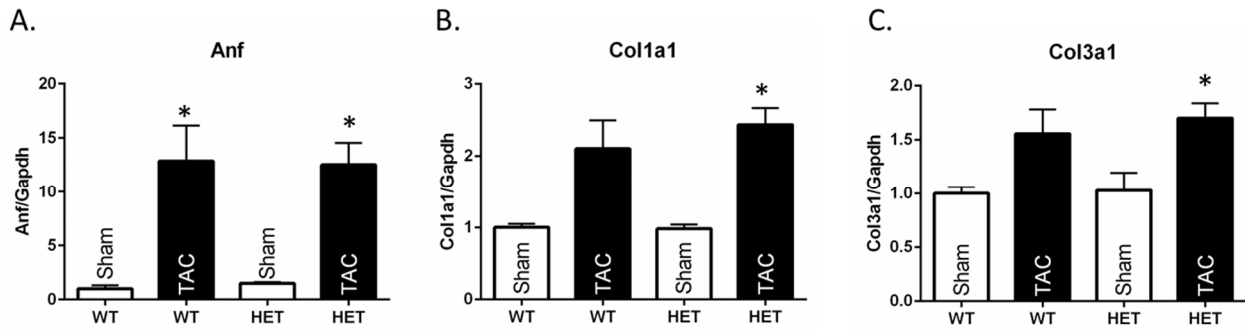

**Supplemental Figure 5: qRT-PCR analysis of WT and Rbm24 HET hearts after 5 weeks of TAC.** qRT-PCR analysis of Anf, Col1a1, and Col3a1 in sham-operated (n=4) and TAC-operated (n=6) WT hearts and sham-operated (n=5) and TAC-operated (n=12) Rbm24 HET hearts. \*  $p < 0.05$  compared to sham animals of the same genotype. No significant interactions were found between the intervention and the genotype by 2-way ANOVA.

Supplemental Table 1: Primers used for genotyping, qRT-PCR and RT-PCR

| <b>Gene</b>                       | <b>Primer sequence</b>   |
|-----------------------------------|--------------------------|
| <b>Genotyping Rbm24 fw</b>        | gcacaccaccagaaggacacg    |
| <b>Genotyping Rbm24 rv</b>        | ggtctgtgatgaccaccgct     |
| <b>Rbm24 fw</b>                   | gccagcctgcgaagtacttt     |
| <b>Rbm24 rv</b>                   | gttgggatccttgaggccctt    |
| <b>skNAC fw</b>                   | tacagagcaggagttgccac     |
| <b>skNAC rv</b>                   | gcagtttcagctggtatggg     |
| <b>Coro6 fw</b>                   | tcatcatctggaatgtgggc     |
| <b>Coro6 rv</b>                   | gtaccgaatgctactgtcac     |
| <b><math>\alpha</math>-NAC fw</b> | tacagagcaggagttgccac     |
| <b><math>\alpha</math>-NAC rv</b> | ctaactgtgcttgctgagac     |
| <b>Col3a1 fw</b>                  | tcaaggctgaaggaaacagca    |
| <b>Col3a1 rv</b>                  | gatgggtagtctcattgcc      |
| <b>ANF fw</b>                     | attgacaggattggagcccagagt |
| <b>ANF rv</b>                     | tgacacaccacaagggcttaggat |
| <b>GAPDH fw</b>                   | ggtggacctcatggcctaca     |
| <b>GAPDH rv</b>                   | ctctcttgctcagtgctcctgct  |
| <b>HPRT fw</b>                    | cctaagatgagcgcaagttgaa   |
| <b>HPRT rv</b>                    | ccacaggactagaacacctgctaa |

Supplemental Table 2: Viable embryos collected from Rbm24 heterozygous intercrosses

| <b>Embryonic stage</b> | <b>Genotype</b> | <b># of embryos</b> |
|------------------------|-----------------|---------------------|
| <b>E11.5</b>           | WT              | 6 (22%)             |
|                        | HET             | 15 (56%)            |
|                        | KO              | 6 (22%)             |
| <b>E12.5/E13.5</b>     | WT              | 11 (40%)            |
|                        | HET             | 14 (52%)            |
|                        | KO              | 2 (7%)              |



Full gels

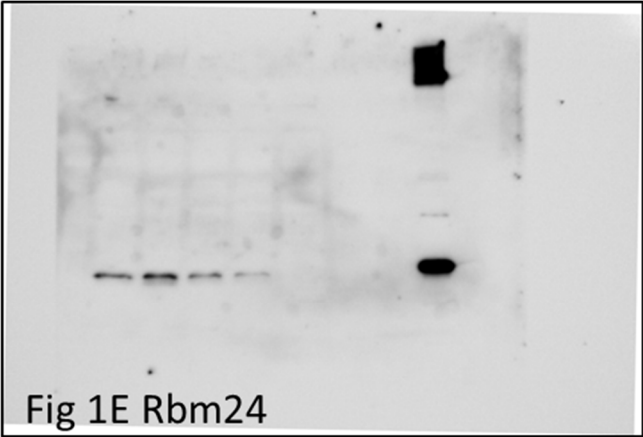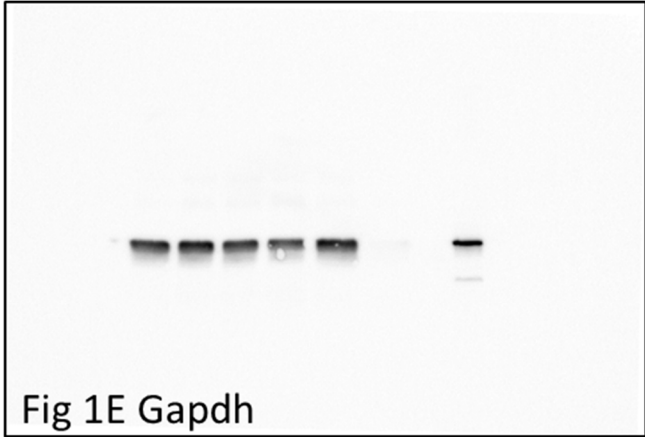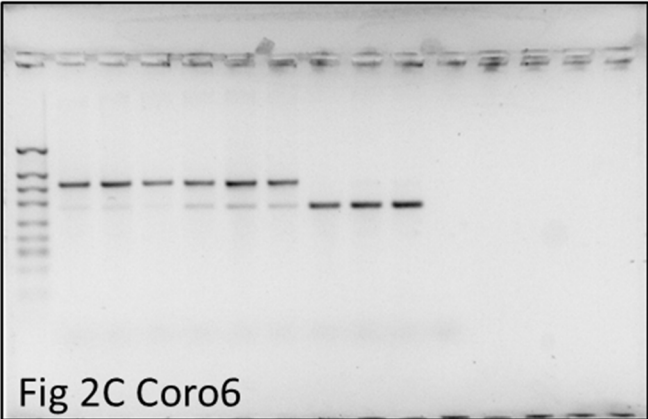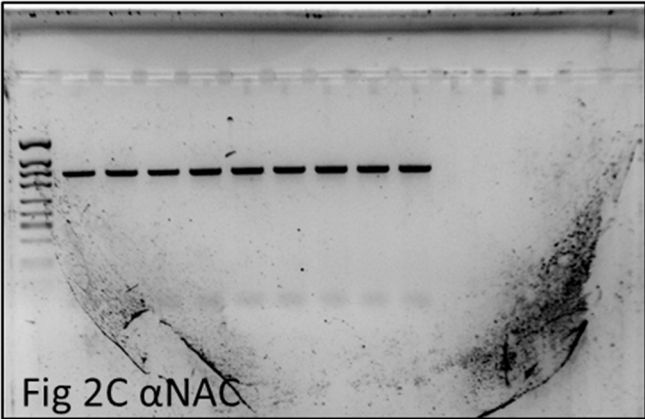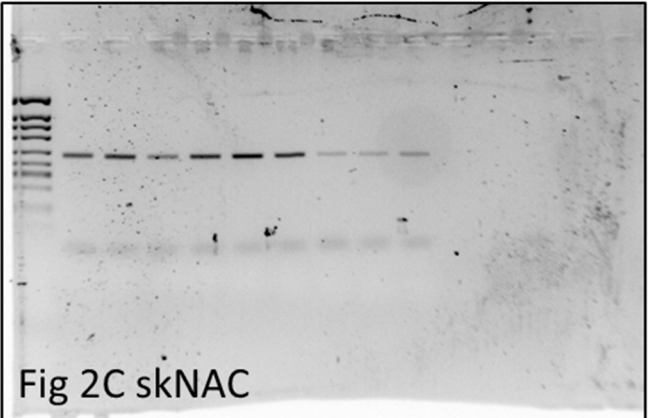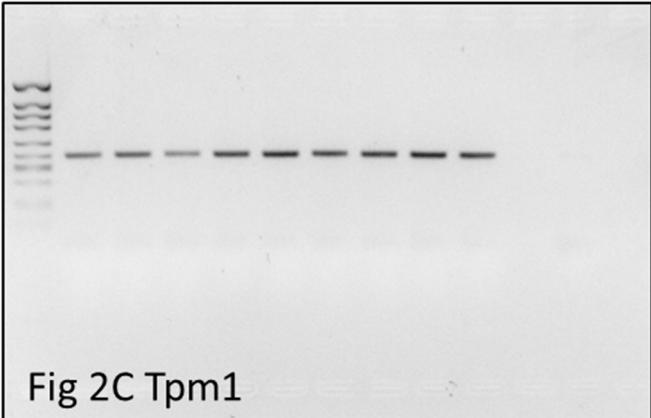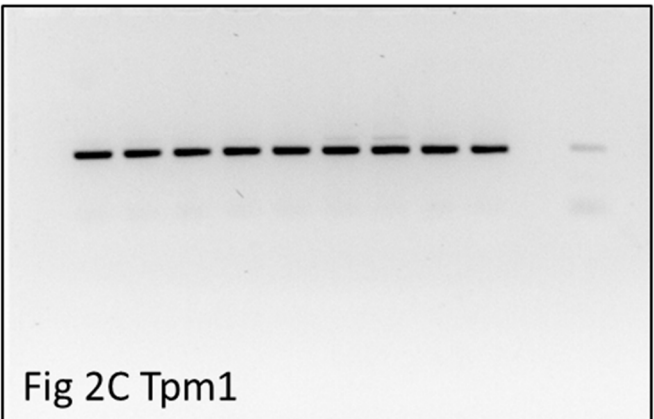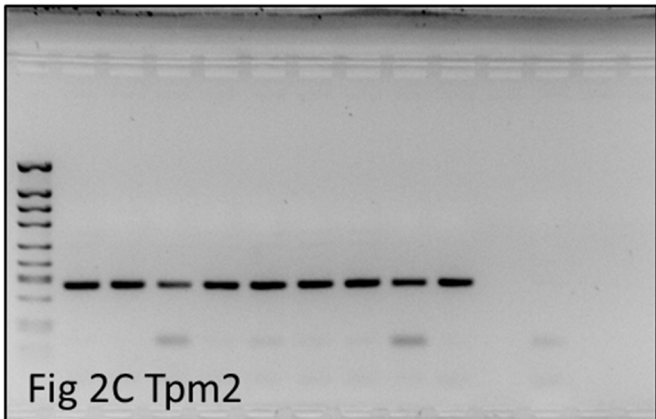

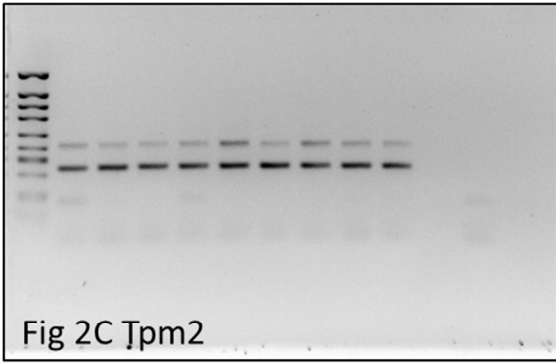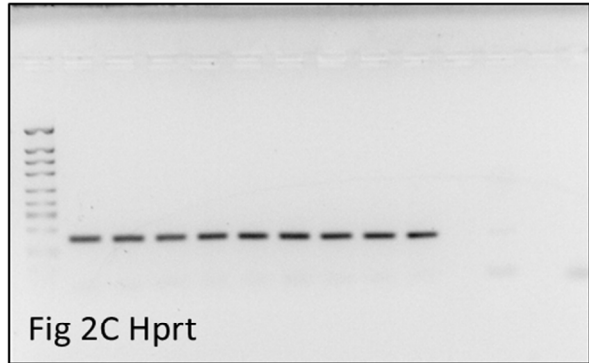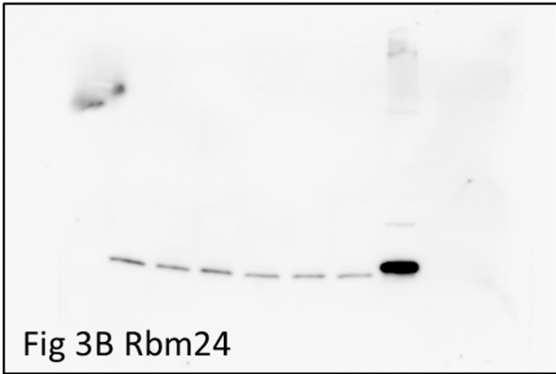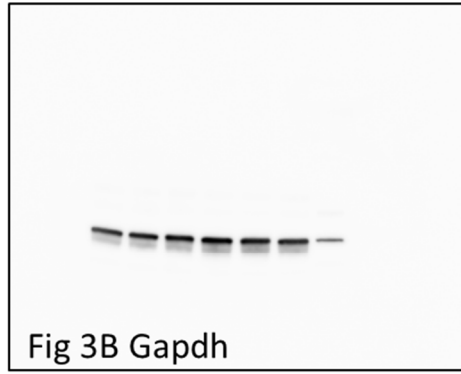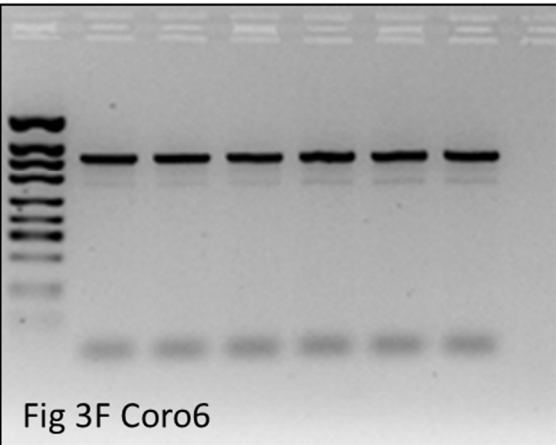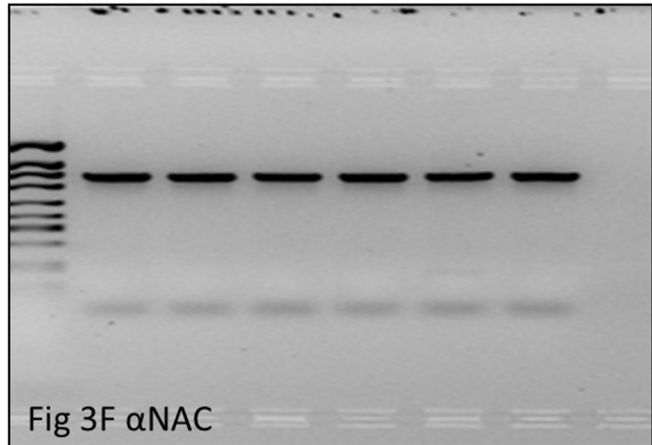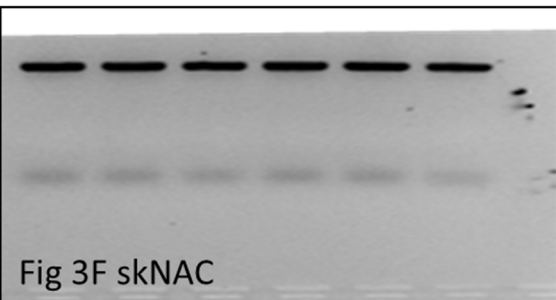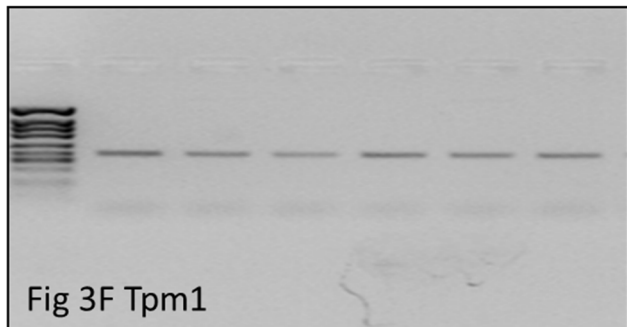

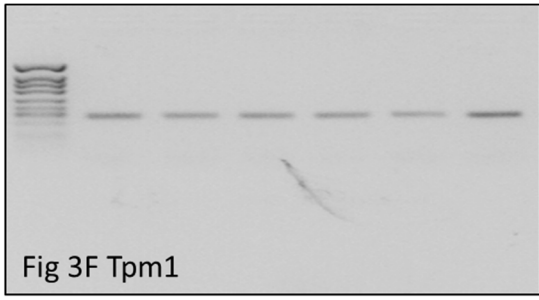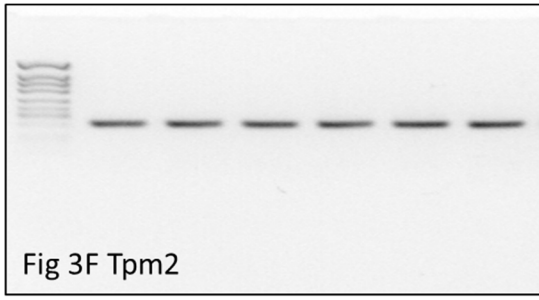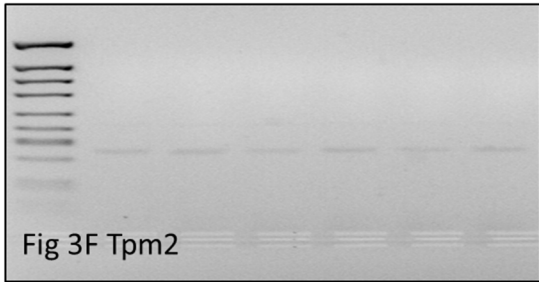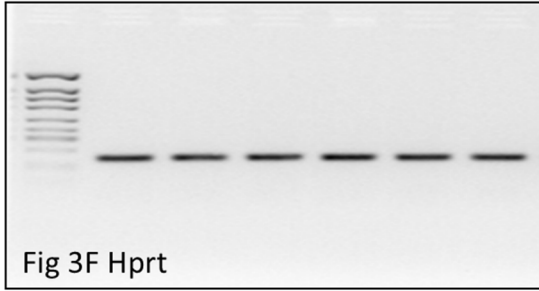

Supplement: 41598_2020_64667_MOESM1_ESM.pdf [file 41598_2020_64667_MOESM1_ESM.pdf]
